# Supplementary material for: Upadacitinib Rapidly Improves Patient-Reported Outcomes in Atopic Dermatitis: 16-Week Results from Phase 3 Clinical Trials (Measure Up 1 and 2)
Source: PubMed Central journal article supplement — Dermatol Ther (Heidelb). 2024 May 2;14(5):1127–44. doi: 10.1007/s13555-024-01157-5 (PMC11116320; doi:10.1007/s13555-024-01157-5), 2024-05-02

## SUPPLEMENTARY MATERIAL

### **Upadacitinib Rapidly Improves Patient-Reported Outcomes in Atopic Dermatitis: 16-Week Results from Phase 3 Clinical Trials (Measure Up 1 and 2)**

Eric L. Simpson • Vimal H. Prajapati • Yael A. Leshem • Raj Chovatiya • Marjolein S. de Bruin-Weller • Sonja Ständer • Andrew E. Pink • Brian M. Calimlim • Wan-Ju Lee • Henrique Teixeira • Barry Ladizinski • Xiaofei Hu • Yang Yang • Yingyi Liu • Meng Liu • Ayman Grada • Andrew M. Platt • Jonathan I. Silverberg

E. L. Simpson

Department of Dermatology, Oregon Health and Science University, Portland, OR, USA

V. H. Prajapati

Division of Dermatology, Department of Medicine, University of Calgary, Calgary, Alberta, Canada; Sections of Community Pediatrics and Pediatric Rheumatology, Department of Pediatrics, University of Calgary, Calgary, Alberta, Canada; Skin Health & Wellness Centre, Calgary, Alberta, Canada; Dermatology Research Institute, Calgary, Alberta, Canada; Probit Medical Research, Calgary, Alberta, Canada

Y. A. Leshem

Division of Dermatology, Rabin Medical Center, Petah Tikva, Israel, and School of Medicine, Tel Aviv University, Tel Aviv, Israel

R. Chovatiya

Chicago Medical School, Rosalind Franklin University of Medicine and Science, North Chicago, IL, USA; Center for Medical Dermatology and Immunology Research, Chicago, IL, USA

M. S. de Bruin-Weller

Department of Dermatology and Allergology, National Expertise Center for Atopic Dermatitis, University Medical Center Utrecht, Utrecht, The Netherlands

S. Ständer

Center for Chronic Pruritus, Münster University Hospital, Münster, Germany

A. E. Pink

St John's Institute of Dermatology, Guy's and St Thomas' NHS Foundation Trust, London, UK

B. M. Calimlim • W-J. Lee • H. Teixeira • B. Ladizinski • X. Hu • Y. Yang • Y. Liu • M. Liu • A. Grada • A. M. Platt

AbbVie Inc., North Chicago, IL, USA

J. I. Silverberg

Department of Dermatology, George Washington University School of Medicine and Health Sciences, Washington, DC, USA

**Corresponding Author:**

Name: Eric Simpson, MD, MCR

Department of Dermatology

Oregon Health and Science University

3303 S. Bond Avenue

Portland, OR 97239

e-mail: [simpsons@ohsu.edu](mailto:simpsons@ohsu.edu)

**Content**

**Supplementary Material Table 1.** Institutional review boards and ethics committees for the Measure Up 1 and Measure Up 2 studies

**Supplementary Material Table 2.** Symptoms assessed by patient-reported outcomes and associated predefined minimal clinically important difference and minimal disease burden score thresholds

---

**Supplementary Material Table 3.** Change from baseline in PROs during the double-blind period for patients enrolled in the Measure Up 1 and Measure Up 2 studies (MMRM)

**Supplementary Material Fig. 1** Percent change from baseline in (a) WP-NRS and (b) SCORAD Itch measures during the double-blind period for patients enrolled in the Measure Up 1 and Measure Up 2 studies (MMRM)

**Supplementary Material Fig. 2** Percent change from baseline in (a) ADerm-SS Skin Pain, (b) ADerm-SS TSS-7, and (c) POEM total score during the double-blind period for patients enrolled in the Measure Up 1 and Measure Up 2 studies (MMRM)

**Supplementary Material Fig. 3** Percent change from baseline in (a) ADerm-IS Sleep (MMRM), (b) SCORAD Sleep (MMRM), and (c) achievement of POEM Sleep 0 (NRI-C) during the double-blind period for patients enrolled in the Measure Up 1 and Measure Up 2 studies

**Supplementary Material Fig. 4** Percent change from baseline in (a) DLQI (MMRM), (b) achievement of CDLQI scores 0/1 (NRI-C), (c) percent change from baseline in CDLQI (MMRM), (d) percent change from baseline in ADerm-IS Daily Activities (MMRM), and (e) percent change from baseline in ADerm-IS Emotional State (MMRM) during the double-blind period for patients enrolled in the Measure Up 1 and Measure Up 2 studies

**Supplementary Material Fig. 5** Patients enrolled in the Measure Up 1 and Measure Up 2 studies who achieved HADS-A scores < 8 and HADS-D scores < 8 during the double-blind period (NRI-C)

**Supplementary Material Fig. 6** Patient global impressions during the double-blind period for patients enrolled in the Measure Up 1 and Measure Up 2 studies for (a) proportion of patients who report symptoms to be “absent” or “minimal” on the PGIS scale, (b) proportion of patients who are “much improved” or “very much improved” on the PGIC scale, and (c) proportion of patients who are “very satisfied” or “extremely satisfied” on the PGIT scale

**Supplementary Material Table 1** Institutional review boards and ethics committees for the Measure Up 1 and Measure Up 2 studies

| Name                                                                                 | Number                                                                                                                                                                                                                                                                                                                                                                                                                                                                                                                                                                                                                                                                                                                                                                                                                                                                                                                                                                                                                                                                                                                                                                                                                                                                                                                                                                                                                                                                                                                                                                                                                                                                                                                                                                                            |
|--------------------------------------------------------------------------------------|---------------------------------------------------------------------------------------------------------------------------------------------------------------------------------------------------------------------------------------------------------------------------------------------------------------------------------------------------------------------------------------------------------------------------------------------------------------------------------------------------------------------------------------------------------------------------------------------------------------------------------------------------------------------------------------------------------------------------------------------------------------------------------------------------------------------------------------------------------------------------------------------------------------------------------------------------------------------------------------------------------------------------------------------------------------------------------------------------------------------------------------------------------------------------------------------------------------------------------------------------------------------------------------------------------------------------------------------------------------------------------------------------------------------------------------------------------------------------------------------------------------------------------------------------------------------------------------------------------------------------------------------------------------------------------------------------------------------------------------------------------------------------------------------------|
| <b>Measure Up 1 Study</b>                                                            |                                                                                                                                                                                                                                                                                                                                                                                                                                                                                                                                                                                                                                                                                                                                                                                                                                                                                                                                                                                                                                                                                                                                                                                                                                                                                                                                                                                                                                                                                                                                                                                                                                                                                                                                                                                                   |
| Advarra                                                                              | REC-0000044274, REC-0000044275, REC-0000044276,<br>REC-0000044305, REC-0000071569, REC-0000071473,<br>REC-0000069722, REC-0000069719, REC-0000069721,<br>REC-0000069720, REC-0000069447, REC-0000069477,<br>REC-0000069443, REC-0000069478, REC-0000069465,<br>REC-0000069449, REC-0000069453, REC-0000069455,<br>REC-0000069459, REC-0000069446, REC-0000069468,<br>REC-0000069438, REC-0000069442, REC-0000069672,<br>REC-0000069475, REC-0000069440, REC-0000069476,<br>REC-0000069439, REC-0000069458, REC-0000069441,<br>REC-0000069450, REC-0000069461, REC-0000069451,<br>REC-0000069677, REC-0000069463, REC-0000069445,<br>REC-0000069462, REC-0000069467, REC-0000069686,<br>REC-0000069457, REC-0000069448, REC-0000032127,<br>REC-0000032126, REC-0000031426, REC-0000031425,<br>REC-0000039714, REC-0000032314, REC-0000032328,<br>REC-0000032341, REC-0000035711, REC-0000034001,<br>REC-0000032311, REC-0000032310, REC-0000032347,<br>REC-0000032317, REC-0000032355, REC-0000033715,<br>REC-0000040222, REC-0000036395, REC-0000032349,<br>REC-0000033925, REC-0000032331, REC-0000032322,<br>REC-0000032315, REC-0000032321, REC-0000032327,<br>REC-0000032323, REC-0000052342, REC-0000032305,<br>REC-0000035743, REC-0000034331, REC-0000032345,<br>REC-0000032330, REC-0000032343, REC-0000045997,<br>REC-0000032457, REC-0000032337, REC-0000032326,<br>REC-0000032338, REC-0000032332, REC-0000032339,<br>REC-0000032325, REC-0000032336, REC-0000032324,<br>REC-0000032313, REC-0000032354, REC-0000032312,<br>REC-0000032353, REC-0000045980, REC-0000036063,<br>REC-0000032333, REC-0000032329, REC-0000032340,<br>REC-0000032356, REC-0000039143, REC-0000038962,<br>REC-0000052339, REC-0000032915, REC-0000038961,<br>REC-0000032351, REC-0000032316, REC-0000031438 |
| Aichi Medical University<br>Hospital IRB                                             | REC-0000028026                                                                                                                                                                                                                                                                                                                                                                                                                                                                                                                                                                                                                                                                                                                                                                                                                                                                                                                                                                                                                                                                                                                                                                                                                                                                                                                                                                                                                                                                                                                                                                                                                                                                                                                                                                                    |
| Bellberry Limited Human<br>Research Ethics Committee                                 | REC-0000048968, REC-0000051199, REC-0000048964,<br>REC-0000051198, REC-0000048966, REC-0000048967,<br>REC-0000048965                                                                                                                                                                                                                                                                                                                                                                                                                                                                                                                                                                                                                                                                                                                                                                                                                                                                                                                                                                                                                                                                                                                                                                                                                                                                                                                                                                                                                                                                                                                                                                                                                                                                              |
| Bioethics Committee of Beijing<br>Friendship Hospital, Capital<br>Medical University | REC-0000069889                                                                                                                                                                                                                                                                                                                                                                                                                                                                                                                                                                                                                                                                                                                                                                                                                                                                                                                                                                                                                                                                                                                                                                                                                                                                                                                                                                                                                                                                                                                                                                                                                                                                                                                                                                                    |
| Brany IRB                                                                            | REC-0000027127                                                                                                                                                                                                                                                                                                                                                                                                                                                                                                                                                                                                                                                                                                                                                                                                                                                                                                                                                                                                                                                                                                                                                                                                                                                                                                                                                                                                                                                                                                                                                                                                                                                                                                                                                                                    |

---

**Supplementary Material Table 1** Institutional review boards and ethics committees for the Measure Up 1 and Measure Up 2 studies

---

| Name                                                                            | Number                                                                                                         |
|---------------------------------------------------------------------------------|----------------------------------------------------------------------------------------------------------------|
| Central Ethics Committee                                                        | REC-0000024111, REC-0000024110, REC-0000024108, REC-0000024109, REC-0000045743, REC-0000024112, REC-0000029994 |
| Clinical Trial Ethics Committee of The Third Affiliated Hospital of Sun Yat-Sen | REC-0000035919                                                                                                 |
| Comisia Nationala de Bioetica a Medicamentului si a Dispozitivelor Medicale     | REC-0000039740, REC-0000039741, REC-0000039739                                                                 |
| Comitato Etico Catania 1                                                        | REC-0000033421, REC-0000067719                                                                                 |
| Comitato Etico Dell Universita Federico li                                      | REC-0000033441                                                                                                 |
| Comitato Etico di Area Vasta Emilia Centro                                      | REC-0000033424                                                                                                 |
| Comitato Etico Indipendente Fondazione PTV Policlinico Tor Vergata              | REC-0000033418                                                                                                 |
| Comitato Etico Regionale Area Vasta Nord Ovest                                  | REC-0000033446                                                                                                 |
| Comitato Etico Regionale delle Marche                                           | REC-0000033416, REC-0000033415                                                                                 |
| Comitato Etico Regione Toscana - Area Vasta Nord Ovest                          | REC-0000067720                                                                                                 |
| Comitato Etico Universita Federico II – Aorn A. Cardarelli                      | REC-0000067718                                                                                                 |
| Comite de Etica de la Investigacion Fundacion Hospitalaria San Vicente de Paul  | REC-0000022550                                                                                                 |
| Comite de Etica e Investigacion IPS Universitaria                               | REC-0000049315                                                                                                 |
| Comite de etica en investigacion Clinisalud del Sur                             | REC-0000046846                                                                                                 |

---

---

**Supplementary Material Table 1** Institutional review boards and ethics committees for the Measure Up 1 and Measure Up 2 studies

---

| Name                                                                             | Number                                                         |
|----------------------------------------------------------------------------------|----------------------------------------------------------------|
| Comite de Etica en Investigacion de la Empresa Social del Estado Hospital Mental | REC-0000022545                                                 |
| Comite de Etica en Investigacion en el Area de la Salud de Universidad del Norte | REC-0000022547                                                 |
| Comite de Etica Framingham                                                       | REC-0000025718                                                 |
| Comité de protection des Personnes Sud Est III                                   | REC-0000034728                                                 |
| Comite de Revision de estudios de Investigacion                                  | REC-0000022546                                                 |
| Comite Independiente de Etica para Ensayos en Farmacologia Clinica - FEFyM       | REC-0000025756, REC-0000025755                                 |
| CPP Sud-Est III                                                                  | REC-0000067920                                                 |
| EC at ME Rivne Regional Dermatology and Venereology Dispensary of RRC            | REC-0000040524                                                 |
| Erciyes University Medical Faculty Clinical Trials Ethics Committee              | REC-0000052325                                                 |
| Ethic Committee of Clinical Center University of Sarajevo                        | REC-0000035985                                                 |
| Ethics Committee of Peking University People's Hospital                          | REC-0000030711                                                 |
| Ethic Committee of the University Clinical Centre of The Republic of Sprska      | REC-0000026799, REC-0000073144, REC-0000036554                 |
| Ethics Committee for Clinical Trials                                             | REC-0000028511                                                 |
| Ethics Committee for Medicinal products                                          | REC-0000061828, REC-0000061827, REC-0000061826, REC-0000061825 |
| Ethics committee Medical Science Research of Peking University Third Hospital    | REC-0000030712                                                 |

---

---

**Supplementary Material Table 1** Institutional review boards and ethics committees for the Measure Up 1 and Measure Up 2 studies

---

| Name                                                                             | Number                                                                                                                                                                         |
|----------------------------------------------------------------------------------|--------------------------------------------------------------------------------------------------------------------------------------------------------------------------------|
| Ethics Committee of Beijing Friendship Hospital Capital Medical University       | REC-0000033354                                                                                                                                                                 |
| Ethics Committee of Huashan Hospital, Fudan University                           | REC-0000030812                                                                                                                                                                 |
| Ethics Committee of Ruijin Hospital Shanghai Jiaotong University School of Medc  | REC-0000033378                                                                                                                                                                 |
| Ethics Committee of Sun Yat-sen Memorial Hospital of Sun Yat-sen University      | REC-0000034145                                                                                                                                                                 |
| Ethics Committee of The First Hospital of China Medical University               | REC-0000030805                                                                                                                                                                 |
| Ethics Committee record of Union Hospital Huazhong University of Science and Tec | REC-0000034165                                                                                                                                                                 |
| Ethics Committee University Clinical Center Tuzla                                | REC-0000045273                                                                                                                                                                 |
| Ethics Counsel at the Ministry of Health of the Russian Federation               | REC-0000025105                                                                                                                                                                 |
| Ethikkommission der MHH                                                          | REC-0000039916, REC-0000039914, REC-0000039913, REC-0000039876, REC-0000039915, REC-0000039917, REC-0000035541, REC-0000039920, REC-0000039918, REC-0000039919, REC-0000030964 |
| Ethikkommission Nordwest- und Zentralschweiz                                     | REC-0000027430, REC-0000027427, REC-0000027429, REC-0000027428, REC-0000036097, REC-0000027426                                                                                 |
| Fukuoka University Hospital Institutional Review Board                           | REC-0000028602                                                                                                                                                                 |
| Gifu University Hospital Institutional Review Board                              | REC-0000021781                                                                                                                                                                 |
| Hacettepe Universitesi Tip Fakultesi Klinik Arastirmalar Etik Kurulu             | REC-0000033641, REC-0000033640, REC-0000033642, REC-0000033639, REC-0000033643                                                                                                 |
| Hamilton Integrated Research Ethics Board                                        | REC-0000021837                                                                                                                                                                 |
| Health and Disability Ethics Committees                                          | REC-0000035806, REC-0000035805, REC-0000069825, REC-0000069826                                                                                                                 |

---

---

**Supplementary Material Table 1** Institutional review boards and ethics committees for the Measure Up 1 and Measure Up 2 studies

---

| Name                                                                                  | Number                                                                                         |
|---------------------------------------------------------------------------------------|------------------------------------------------------------------------------------------------|
| Health Research Ethics Board                                                          | REC-0000022531                                                                                 |
| Health Research Ethics Board of Alberta                                               | REC-0000028056, REC-0000028052                                                                 |
| Henry Ford Health System Institutional Review Board                                   | REC-0000027170                                                                                 |
| Horizon Health Network Research Ethics Board                                          | REC-0000025045                                                                                 |
| IEC of The Second Affiliated Hospital Zhejiang University School of Medicine          | REC-0000033503                                                                                 |
| Independent Ethics Committee of SBIoH CDD                                             | REC-0000023859                                                                                 |
| Joint Institutional Review Board                                                      | REC-0000027403                                                                                 |
| Kyushu Central Hospital of the Mutual Aid Association of Public School Teachers       | REC-0000027535                                                                                 |
| LEC of CI Zaporizhzhya Regional Skin and Venereal Clinical Dispensary of ZRC          | REC-0000040525                                                                                 |
| LEC of Military Hospital Military Unit A3309                                          | REC-0000050580                                                                                 |
| Local Ethics Committee at Ural Research Institute of DV and Immunopathology           | REC-0000022232                                                                                 |
| Local Ethics Committee of Chelyabinsk Regional Clinical Dermatovenerologic Dispensary | REC-0000022155                                                                                 |
| Local Ethics committee of NMRC of Children's Health of the MoH of the RF              | REC-0000024578                                                                                 |
| Local Ethics Committee of Saratov State Medical University n.a. V.I. Razumovskiy      | REC-0000022422                                                                                 |
| London-London Bridge Research Ethics Committee                                        | REC-0000027671, REC-0000030736, REC-0000030750, REC-0000030754, REC-0000030753, REC-0000030748 |

---



---

**Supplementary Material Table 1** Institutional review boards and ethics committees for the Measure Up 1 and Measure Up 2 studies

---

| Name                                                                   | Number                                                                                                                                                                                                                                                                                                                                                                                                         |
|------------------------------------------------------------------------|----------------------------------------------------------------------------------------------------------------------------------------------------------------------------------------------------------------------------------------------------------------------------------------------------------------------------------------------------------------------------------------------------------------|
| Medical Corporation Kojinkai Sapporo Skin Clinic IRB                   | REC-0000027425, REC-0000027424                                                                                                                                                                                                                                                                                                                                                                                 |
| Medical Research and Ethics Committee                                  | REC-0000035628, REC-0000032275, REC-0000032274, REC-0000032276                                                                                                                                                                                                                                                                                                                                                 |
| Northwestern University IRB Office, Biomedical IRB                     | REC-0000033858                                                                                                                                                                                                                                                                                                                                                                                                 |
| NTT Medical Center Tokyo Institutional Review Board                    | REC-0000022544                                                                                                                                                                                                                                                                                                                                                                                                 |
| Ogaki Municipal Hospital Institutional Review Board                    | REC-0000027032                                                                                                                                                                                                                                                                                                                                                                                                 |
| Oregon Health and Science University, Research Integrity Office        | REC-0000022720                                                                                                                                                                                                                                                                                                                                                                                                 |
| Quorum Review IRB                                                      | REC-0000052340, REC-0000052341, REC-0000027794, REC-0000024926, REC-0000026266, REC-0000025762, REC-0000026394, REC-0000025421, REC-0000026323, REC-0000028475, REC-0000025418, REC-0000026844, REC-0000025414, REC-0000025794, REC-0000028400, REC-0000032120, REC-0000032125, REC-0000025771, REC-0000026267, REC-0000028401, REC-0000027099, REC-0000028547, REC-0000026912, REC-0000025764, REC-0000025195 |
| Research Ethics Committee of National Institute for Health Development | REC-0000041721, REC-0000041720, REC-0000041719, REC-0000041718                                                                                                                                                                                                                                                                                                                                                 |
| Research Review Board Inc                                              | REC-0000028132, REC-0000028112, REC-0000028109, REC-0000028133, REC-0000028134, REC-0000025833                                                                                                                                                                                                                                                                                                                 |
| The National Committee on Health Research Ethics                       | REC-0000027193, REC-0000027192, REC-0000027191, REC-0000027194                                                                                                                                                                                                                                                                                                                                                 |
| University Hospital Kyoto Prefectural University of Medicine IRB       | REC-0000027404                                                                                                                                                                                                                                                                                                                                                                                                 |
| University of Manitoba Research Ethics - Bannatyne                     | REC-0000028057                                                                                                                                                                                                                                                                                                                                                                                                 |
| University of Pennsylvania Institutional Review Board                  | REC-0000040002                                                                                                                                                                                                                                                                                                                                                                                                 |
| University of Yamanashi Hospital, IRB                                  | REC-0000027926                                                                                                                                                                                                                                                                                                                                                                                                 |

---

---

**Supplementary Material Table 1** Institutional review boards and ethics committees for the Measure Up 1 and Measure Up 2 studies
 

---

| Name                                                                                  | Number                                                                                                                                                                                                                                                                                                                                                                                                                                                                                                                                                                                                                                                                                                                                                                                                                                                                                                                                                                                                                                                                                     |
|---------------------------------------------------------------------------------------|--------------------------------------------------------------------------------------------------------------------------------------------------------------------------------------------------------------------------------------------------------------------------------------------------------------------------------------------------------------------------------------------------------------------------------------------------------------------------------------------------------------------------------------------------------------------------------------------------------------------------------------------------------------------------------------------------------------------------------------------------------------------------------------------------------------------------------------------------------------------------------------------------------------------------------------------------------------------------------------------------------------------------------------------------------------------------------------------|
| Varsinais-Suomen<br>Sairaanhoitopiirin Eettinen<br>Toimikunta                         | REC-0000025019, REC-0000026246, REC-0000026249,<br>REC-0000026248                                                                                                                                                                                                                                                                                                                                                                                                                                                                                                                                                                                                                                                                                                                                                                                                                                                                                                                                                                                                                          |
| Yaizu City Hospital<br>Institutional Review Board                                     | REC-0000027539                                                                                                                                                                                                                                                                                                                                                                                                                                                                                                                                                                                                                                                                                                                                                                                                                                                                                                                                                                                                                                                                             |
| <b>Measure Up 2 Study</b>                                                             |                                                                                                                                                                                                                                                                                                                                                                                                                                                                                                                                                                                                                                                                                                                                                                                                                                                                                                                                                                                                                                                                                            |
| Advarra                                                                               | REC-0000044383, REC-0000044473, REC-0000046347,<br>REC-0000046348, REC-0000047395, REC-0000046820,<br>REC-0000046140, REC-0000048013, REC-0000046101,<br>REC-0000047010, REC-0000046945, REC-0000046991,<br>REC-0000046346, REC-0000046932, REC-0000053767,<br>REC-0000053723, REC-0000053796, REC-0000053794,<br>REC-0000053772, REC-0000053781, REC-0000053770,<br>REC-0000053759, REC-0000053719, REC-0000053717,<br>REC-0000053779, REC-0000053792, REC-0000053765,<br>REC-0000053799, REC-0000053773, REC-0000053782,<br>REC-0000053797, REC-0000053721, REC-0000053795,<br>REC-0000053790, REC-0000044380, REC-0000044381,<br>REC-0000046139, REC-0000050399, REC-0000049844,<br>REC-0000053730, REC-0000053715, REC-0000053720,<br>REC-0000053731, REC-0000053735, REC-0000053734,<br>REC-0000053728, REC-0000053732, REC-0000053778,<br>REC-0000053785, REC-0000053788, REC-0000053713,<br>REC-0000053768, REC-0000053793, REC-0000053714,<br>REC-0000053798, REC-0000053763, REC-0000053777,<br>REC-0000053718, REC-0000053762, REC-0000053716,<br>REC-0000053764, REC-0000053776 |
| Bellberry Limited Human<br>Research Ethics Committee                                  | REC-0000051229, REC-0000051228, REC-0000051230                                                                                                                                                                                                                                                                                                                                                                                                                                                                                                                                                                                                                                                                                                                                                                                                                                                                                                                                                                                                                                             |
| Ce Della Fondazione Pol.<br>Univ. A. Gemelli Irccs Univ.<br>Cattolica Del Sacro Cuore | REC-0000067726, REC-0000064036                                                                                                                                                                                                                                                                                                                                                                                                                                                                                                                                                                                                                                                                                                                                                                                                                                                                                                                                                                                                                                                             |
| Comissão de Ética para a<br>Investigação Clínica                                      | REC-0000029197, REC-0000029195, REC-0000029194,<br>REC-0000029193, REC-0000029196, REC-0000036809,<br>REC-0000028606                                                                                                                                                                                                                                                                                                                                                                                                                                                                                                                                                                                                                                                                                                                                                                                                                                                                                                                                                                       |
| CEIC Hospital General<br>Universitario Gregorio<br>Marañon-Area 1                     | REC-0000045923, REC-0000029530, REC-0000039673,<br>REC-0000039675, REC-0000039674, REC-0000029529,<br>REC-0000029527, REC-0000029525, REC-0000029526,<br>REC-0000029528, REC-0000029524, REC-0000045924,<br>REC-0000045909, REC-0000067620                                                                                                                                                                                                                                                                                                                                                                                                                                                                                                                                                                                                                                                                                                                                                                                                                                                 |

---

---

**Supplementary Material Table 1** Institutional review boards and ethics committees for the Measure Up 1 and Measure Up 2 studies

---

| Name                                                                            | Number                                                                                                                                         |
|---------------------------------------------------------------------------------|------------------------------------------------------------------------------------------------------------------------------------------------|
| Central Ethics Committee                                                        | REC-0000024120, REC-0000024117, REC-0000030030, REC-0000030031, REC-0000030032, REC-0000037094, REC-0000024116, REC-0000024118                 |
| Centralised Institutional Review Board                                          | REC-0000027952, REC-0000027951, REC-0000027949, REC-0000027947, REC-0000027950, REC-0000027948                                                 |
| Chang Gung Medical Foundation Institutional Review Board                        | REC-0000028459, REC-0000028458                                                                                                                 |
| Clinical Research Ethics Committee of Cork Teaching Hospitals                   | REC-0000027496, REC-0000027493, REC-0000027494, REC-0000027495, REC-0000035989                                                                 |
| Comitato Etico Centrale Irccs - Sezione Ifo-Fondazione Bietti                   | REC-0000033478                                                                                                                                 |
| Comitato Etico della Fondazione A. Gemelli Università Cattolica del Sacro Cuore | REC-0000033483, REC-0000033482                                                                                                                 |
| Comitato Etico di Brescia                                                       | REC-0000067727                                                                                                                                 |
| Comitato Etico Indipendente AOU di Cagliari                                     | REC-0000033498                                                                                                                                 |
| Comitato Etico per le province di L'Aquila e Teramo                             | REC-0000033479, REC-0000067728                                                                                                                 |
| Comitato Etico Provinciale della Provincia di Brescia                           | REC-0000033474                                                                                                                                 |
| Comitato Etico Territoriale Lombardia 3                                         | REC-0000033481                                                                                                                                 |
| Comité d'éthique hospitalo-facultaire                                           | REC-0000031739, REC-0000035524, REC-0000034127, REC-0000039868                                                                                 |
| Comite de Protection des Personnes Ile de France III                            | REC-0000067913, REC-0000035620                                                                                                                 |
| Egeszsegügyi Tudományos Tanács Klinikai Farmakológiai Etikai Bizottság          | REC-0000046061, REC-0000046046, REC-0000039174, REC-0000039177, REC-0000039178, REC-0000039175, REC-0000039180, REC-0000039176, REC-0000039179 |
| Ethics Committee for Clinical Trials                                            | REC-0000024559, REC-0000025157, REC-0000035893, REC-0000037245                                                                                 |

---

---

**Supplementary Material Table 1** Institutional review boards and ethics committees for the Measure Up 1 and Measure Up 2 studies

---

| Name                                                                       | Number                                                                                                                                                                         |
|----------------------------------------------------------------------------|--------------------------------------------------------------------------------------------------------------------------------------------------------------------------------|
| Ethikkommission der Stadt Wien                                             | REC-0000032040, REC-0000032039, REC-0000032548, REC-0000035894, REC-0000032041                                                                                                 |
| Ethikkommission der Universitaet zu Luebeck                                | REC-0000067514, REC-0000031348, REC-0000039939, REC-0000039936, REC-0000039934, REC-0000039931, REC-0000035540, REC-0000039935, REC-0000039938, REC-0000039933, REC-0000039937 |
| Eticka komise Fakultni nemocnice v Motole                                  | REC-0000046142                                                                                                                                                                 |
| Eticka komise Krajske zdravotni - Masarykovy nemocnice v Usti nad Labem    | REC-0000032599                                                                                                                                                                 |
| Eticka komise VFN v Praze                                                  | REC-0000032555, REC-0000032551, REC-0000032554                                                                                                                                 |
| Eticka komise Vseobecne fakultni nemocnice v Praze                         | REC-0000068058, REC-0000068115                                                                                                                                                 |
| Hallym University Kangnam Sacred Heart Hospital Institutional Review Board | REC-0000036706, REC-0000067455                                                                                                                                                 |
| Health and Disability Ethics Committees                                    | REC-0000033561, REC-0000033560, REC-0000072706                                                                                                                                 |
| Health Research Ethics Authority                                           | REC-0000028629                                                                                                                                                                 |
| Health Research Ethics Board of Alberta Clinical Trials Committee          | REC-0000030226, REC-0000031998                                                                                                                                                 |
| Health Sciences IRB                                                        | REC-0000032085                                                                                                                                                                 |
| Institutional Review Board Korea University Ansan Hospital                 | REC-0000036704                                                                                                                                                                 |
| Institutional Review Board of Ajou University Hospital                     | REC-0000036557                                                                                                                                                                 |
| Institutional Review Board of Chung-Ang University Hospital                | REC-0000067645, REC-0000039435                                                                                                                                                 |
| Institutional Review Board of Soon Chun Hyang University Hospital Bucheon  | REC-0000034523, REC-0000071775, REC-0000071775                                                                                                                                 |

---

---

**Supplementary Material Table 1** Institutional review boards and ethics committees for the Measure Up 1 and Measure Up 2 studies

---

| Name                                                                            | Number                                                                                                                                                                                                                                                                                                                                                                                                                                                                                                                                                                                                                                                                                                                                                                                                                                                                                                                                                                                                                                         |
|---------------------------------------------------------------------------------|------------------------------------------------------------------------------------------------------------------------------------------------------------------------------------------------------------------------------------------------------------------------------------------------------------------------------------------------------------------------------------------------------------------------------------------------------------------------------------------------------------------------------------------------------------------------------------------------------------------------------------------------------------------------------------------------------------------------------------------------------------------------------------------------------------------------------------------------------------------------------------------------------------------------------------------------------------------------------------------------------------------------------------------------|
| Institutional Review board of The Catholic University of Korea Incheon Hospital | REC-0000038046                                                                                                                                                                                                                                                                                                                                                                                                                                                                                                                                                                                                                                                                                                                                                                                                                                                                                                                                                                                                                                 |
| Joint Institutional Review Board, Taipei Medical University                     | REC-0000028462                                                                                                                                                                                                                                                                                                                                                                                                                                                                                                                                                                                                                                                                                                                                                                                                                                                                                                                                                                                                                                 |
| Lokální etická komise FN Plzeň                                                  | REC-0000032598                                                                                                                                                                                                                                                                                                                                                                                                                                                                                                                                                                                                                                                                                                                                                                                                                                                                                                                                                                                                                                 |
| London Bridge Research Ethics Committee                                         | REC-0000068913                                                                                                                                                                                                                                                                                                                                                                                                                                                                                                                                                                                                                                                                                                                                                                                                                                                                                                                                                                                                                                 |
| METC UMCG                                                                       | REC-0000034030                                                                                                                                                                                                                                                                                                                                                                                                                                                                                                                                                                                                                                                                                                                                                                                                                                                                                                                                                                                                                                 |
| National Organization of Medicines and National Ethics Committee                | REC-0000024711, REC-0000026691, REC-0000026686, REC-0000025329, REC-0000026454                                                                                                                                                                                                                                                                                                                                                                                                                                                                                                                                                                                                                                                                                                                                                                                                                                                                                                                                                                 |
| Quorum Review IRB                                                               | REC-0000040647, REC-0000042006, REC-0000025142, REC-0000039653, REC-0000039711, REC-0000032610, REC-0000026897, REC-0000034575, REC-0000027857, REC-0000032607, REC-0000035862, REC-0000026956, REC-0000032079, REC-0000027594, REC-0000032269, REC-0000027165, REC-0000032608, REC-0000032538, REC-0000028548, REC-0000031205, REC-0000029345, REC-0000030667, REC-0000031005, REC-0000032005, REC-0000032254, REC-0000035864, REC-0000034351, REC-0000034649, REC-0000034639, REC-0000035111, REC-0000036201, REC-0000037397, REC-0000036407, REC-0000035858, REC-0000034260, REC-0000034238, REC-0000039847, REC-0000039848, REC-0000040189, REC-0000040292, REC-0000040299, REC-0000027417, REC-0000032270, REC-0000032609, REC-0000028451, REC-0000028567, REC-0000028537, REC-0000028482, REC-0000032137, REC-0000032881, REC-0000028538, REC-0000035850, REC-0000035832, REC-0000034769, REC-0000034390, REC-0000034258, REC-0000033838, REC-0000034757, REC-0000032536, REC-0000032211, REC-0000037334, REC-0000036791, REC-0000044915 |
| Research Ethics Committee National Taiwan University Hospital                   | REC-0000068208, REC-0000028456                                                                                                                                                                                                                                                                                                                                                                                                                                                                                                                                                                                                                                                                                                                                                                                                                                                                                                                                                                                                                 |
| Research Review Board Inc                                                       | REC-0000041394, REC-0000051818, REC-0000051816, REC-0000051813, REC-0000051815, REC-0000034968, REC-0000034967, REC-0000028203, REC-0000032130, REC-0000034969, REC-0000034965                                                                                                                                                                                                                                                                                                                                                                                                                                                                                                                                                                                                                                                                                                                                                                                                                                                                 |

---

---

**Supplementary Material Table 1** Institutional review boards and ethics committees for the Measure Up 1 and Measure Up 2 studies

---

| Name                                                                  | Number                                                                                         |
|-----------------------------------------------------------------------|------------------------------------------------------------------------------------------------|
| Royal Children's Hospital HREC                                        | REC-0000032466, REC-0000032463, REC-0000032465, REC-0000032464, REC-0000046175                 |
| Seoul National University Hospital Institute Review Board             | REC-0000036705                                                                                 |
| South Central – Berkshire REC                                         | REC-0000055740, REC-0000055738, REC-0000055737, REC-0000055739, REC-0000055735, REC-0000055736 |
| The Institutional Review Board Chung Shan Medical University Hospital | REC-0000028460                                                                                 |
| The National Committee on Health Research Ethics                      | REC-0000027197, REC-0000027195, REC-0000027196                                                 |
| UBC Clinical Research Ethics Board                                    | REC-0000034514                                                                                 |
| UCSD Human Research Protections Program                               | REC-0000034048                                                                                 |
| University of Southern California Institutional Review Board          | REC-0000060510                                                                                 |
| Western Institutional Review Board                                    | REC-0000032144                                                                                 |

---

**Supplementary Material Table 2** Symptoms assessed by patient-reported outcomes and associated predefined minimal clinically important difference and minimal disease burden score thresholds

| Patient-reported outcome        | Symptom/concept assessed     | Score range                                          | Minimal clinically important difference (improvement) | Analysis type | Minimal disease burden score <sup>b</sup>       | Analysis type |
|---------------------------------|------------------------------|------------------------------------------------------|-------------------------------------------------------|---------------|-------------------------------------------------|---------------|
| WP-NRS <sup>a</sup>             | Itch                         | 0–10                                                 | ≥ 4 <sup>c</sup>                                      | Predefined    | 0/1                                             | Predefined    |
| ADerm-IS Sleep <sup>a</sup>     | Sleep                        | 0–30                                                 | ≥ 12 <sup>d</sup>                                     | Predefined    | 0–3                                             | Post hoc      |
| ADerm-IS Daily Activities       | QoL                          | 0–40                                                 | ≥ 14 <sup>d</sup>                                     | Predefined    | 0–2                                             | Post hoc      |
| ADerm-IS Emotional State        | QoL                          | 0–30                                                 | ≥ 11 <sup>d</sup>                                     | Predefined    | 0–2                                             | Post hoc      |
| ADerm-SS Skin Pain <sup>a</sup> | Skin pain                    | 0–10                                                 | ≥ 4 <sup>d</sup>                                      | Predefined    | 0/1                                             | Post hoc      |
| ADerm-SS TSS-7                  | Skin pain and other symptoms | 0–70                                                 | ≥ 28 <sup>d</sup>                                     | Predefined    | 0–11                                            | Post hoc      |
| POEM Total                      | Skin pain and other symptoms | 0–28                                                 | ≥ 4 <sup>d</sup>                                      | Predefined    | 0–2                                             | Post hoc      |
| POEM Sleep                      | Sleep                        | 0–4                                                  | N/A                                                   | N/A           | 0                                               | Predefined    |
| DLQI                            | QoL                          | 0–30                                                 | ≥ 4 <sup>d</sup>                                      | Predefined    | 0/1 <sup>d</sup>                                | Predefined    |
| CDLQI                           | QoL                          | 0–30                                                 | N/A                                                   | N/A           | 0/1                                             | Predefined    |
| HADS-A                          | Anxiety                      | 0–21                                                 | N/A                                                   | N/A           | < 8 <sup>e</sup>                                | Predefined    |
| HADS-D                          | Depression                   | 0–21                                                 | N/A                                                   | N/A           | < 8 <sup>e</sup>                                | Predefined    |
| PGIS                            | Impression of severity       | 0 (absent) – 6 (very severe)                         | N/A                                                   | N/A           | “Absent” or “minimal” (0/1)                     | Predefined    |
| PGIC                            | Impression of change         | 0 (very much improved) – 6 (very much worse)         | N/A                                                   | N/A           | “Much improved” or “very much improved” (0/1)   | Predefined    |
| PGIT                            | Impression of treatment      | 0 (Extremely dissatisfied) – 6 (extremely satisfied) | N/A                                                   | N/A           | “Very satisfied” or “extremely satisfied” (0/1) | Predefined    |

---

*ADerm-IS* Atopic Dermatitis Impact Scale, *ADerm-SS* Atopic Dermatitis Symptom Scale, *CDLQI* Children's Dermatology Life Quality Index, *DLQI* Dermatology Life Quality Index, *HADS* Hospital Anxiety and Depression Scale, *HADS-A* HADS Anxiety, *HADS-D* HADS Depression, *N/A* not applicable, *PGIC* Patient Global Impression of Change, *PGIS* Patient Global Impression of Severity, *PGIT* Patient Global Impression of Treatment, *POEM* Patient-Oriented Eczema Measure, *PROs* patient-reported outcomes, *QoL* quality of life, *TSS-77*-item total symptom score, *WP-NRS* Worst Pruritus Numerical Rating Scale

*WP-NRS*, *ADerm-SS*, and *ADerm-IS* were assessed via electronic handheld devices at home, while other *PROs* were assessed at select weekly visits through the 16-week double-blind period

<sup>a</sup>Endpoints were assessed daily, with the weekly average used for the analyses in this report. Values were rounded to the nearest integer when determining the achievement of the minimal disease burden threshold score

<sup>b</sup>Defined as "absent" or "minimal" symptoms (*WP-NRS*, *ADerm-SS*) or impact on *QoL* (*ADerm-IS*), "clear" or "almost clear" (*POEM* Total), "no days" of sleep disturbance in the past week (*POEM* Sleep), "no effect at all on patient's life" (*DLQI*, *CDLQI*), and within normal levels of anxiety and depression (*HADS-A*, *HADS-D*). Scores were rounded to the nearest integer

<sup>c</sup> Multiplicity-controlled endpoint within the Measure Up 1 and Measure Up 2 trials at weeks 1, 4, and 16

<sup>d</sup> Multiplicity-controlled endpoint within the Measure Up 1 and Measure Up 2 trials at week 16

<sup>e</sup> Multiplicity-controlled endpoint within the Measure Up 1 and Measure Up 2 trials at week 16 for the achievement of both *HADS-A* scores < 8 and *HADS-D* scores < 8



**Supplementary Material Table 3** Change from baseline in PROs during the double-blind period for patients enrolled in the Measure Up 1 and Measure Up 2 studies (MMRM)

| PRO, LS mean change<br>(95% CI) | Week | UPA 15 mg            | UPA 30 mg            | PBO                  | Nominal statistical<br>significance versus PBO |           |
|---------------------------------|------|----------------------|----------------------|----------------------|------------------------------------------------|-----------|
|                                 |      |                      |                      |                      | UPA 15 mg                                      | UPA 30 mg |
| WP-NRS                          | 1    | -1.7 (-1.9, -1.6)    | -2.1 (-2.3, -2.0)    | -0.2 (-0.3, 0)       | ***                                            | ***       |
|                                 | 16   | -4.1 (-4.3, -3.9)    | -5.0 (-5.2, -4.8)    | -1.6 (-1.9, -1.4)    | ***                                            | ***       |
| ADerm-SS Skin Pain              | 1    | -1.8 (-2.0, -1.6)    | -2.1 (-2.3, -2.0)    | -0.2 (-0.4, -0.1)    | ***                                            | ***       |
|                                 | 16   | -4.0 (-4.2, -3.7)    | -4.8 (-5.0, -4.5)    | -1.7 (-1.9, -1.4)    | ***                                            | ***       |
| ADerm-SS TSS-7                  | 1    | -16.0 (-17.4, -14.7) | -19.5 (-20.8, -18.1) | -1.7 (-3.0, -0.4)    | ***                                            | ***       |
|                                 | 16   | -28.7 (-30.3, -27.1) | -33.8 (-35.3, -32.2) | -12.3 (-14.2, -10.4) | ***                                            | ***       |
| POEM Total                      | 2    | -10.9 (-11.4, -10.3) | -12.9 (-13.5, -12.3) | -2.1 (-2.7, -1.5)    | ***                                            | ***       |
|                                 | 16   | -12.1 (-12.8, -11.4) | -14.9 (-15.5, -14.2) | -4.4 (-5.2, -3.5)    | ***                                            | ***       |
| ADerm-IS Sleep                  | 1    | -5.1 (-5.6, -4.6)    | -6.2 (-6.7, -5.7)    | -0.4 (-0.9, 0.1)     | ***                                            | ***       |
|                                 | 16   | -11.6 (-12.3, -10.9) | -13.7 (-14.4, -13.0) | -4.4 (-5.2, -3.6)    | ***                                            | ***       |
| DLQI                            | 2    | -9.0 (-9.6, -8.3)    | -10.2 (-10.8, -9.6)  | -2.1 (-2.8, -1.5)    | ***                                            | ***       |
|                                 | 16   | -10.2 (-10.9, -9.6)  | -11.8 (-12.5, -11.2) | -4.5 (-5.3, -3.7)    | ***                                            | ***       |
| CDLQI                           | 2    | -7.7 (-9.1, -6.4)    | -9.9 (-11.4, -8.5)   | -3.8 (-5.2, -2.4)    | ***                                            | ***       |
|                                 | 16   | -9.0 (-10.7, -7.3)   | -11.8 (-13.7, -10.0) | -3.7 (-5.9, -1.6)    | ***                                            | ***       |
| ADerm-IS Emotional State        | 1    | -9.8 (-10.5, -9.1)   | -11.8 (-12.5, -11.1) | -1.7 (-2.4, -1.0)    | ***                                            | ***       |
|                                 | 16   | -12.9 (-13.7, -12.1) | -15.0 (-15.8, -14.2) | -5.8 (-6.7, -4.8)    | ***                                            | ***       |
| ADerm-IS Daily Activities       | 1    | -7.8 (-8.6, -6.9)    | -9.5 (-10.3, -8.6)   | -0.8 (-1.6, -0.1)    | ***                                            | ***       |
|                                 | 16   | -15.4 (-16.4, -14.5) | -17.4 (-18.3, -16.4) | -6.9 (-8.0, -5.8)    | ***                                            | ***       |

*ADerm-IS* Atopic Dermatitis Impact Scale, *ADerm-SS* Atopic Dermatitis Symptom Scale, *CDLQI* Children's Dermatology Life Quality Index, *CI* confidence interval, *DLQI* Dermatology Life Quality Index, *LS*, least squares; *MMRM* mixed-effect model repeat measurement, *PBO* placebo, *POEM* Patient-Oriented Eczema Measure, *PROs* patient-reported outcomes, *UPA* upadacitinib, *TSS-7* 7-item total symptom score, *WP-NRS* Worst Pruritus Numerical Rating Scale

\*\*\*  $p < 0.001$  versus PBO

**Supplementary Material Fig. 1** Percent change from baseline in (a) WP-NRS and (b) SCORAD Itch measures during the double-blind period for patients enrolled in the Measure Up 1 and Measure Up 2 studies (MMRM). Percent change from baseline was estimated via LS mean. Comparisons at time points in shaded boxes were multiplicity controlled. \*Nominal  $P < 0.001$  versus placebo for all time points. \*\*Multiplicity adjusted  $P < 0.001$  versus placebo. *LS* least squares, *MMRM* mixed-effect model repeat measurement, *PBO* placebo, *SCORAD* SCORing Atopic Dermatitis, *UPA* upadacitinib, *WP-NRS* Worst Pruritus Numerical Rating Scale

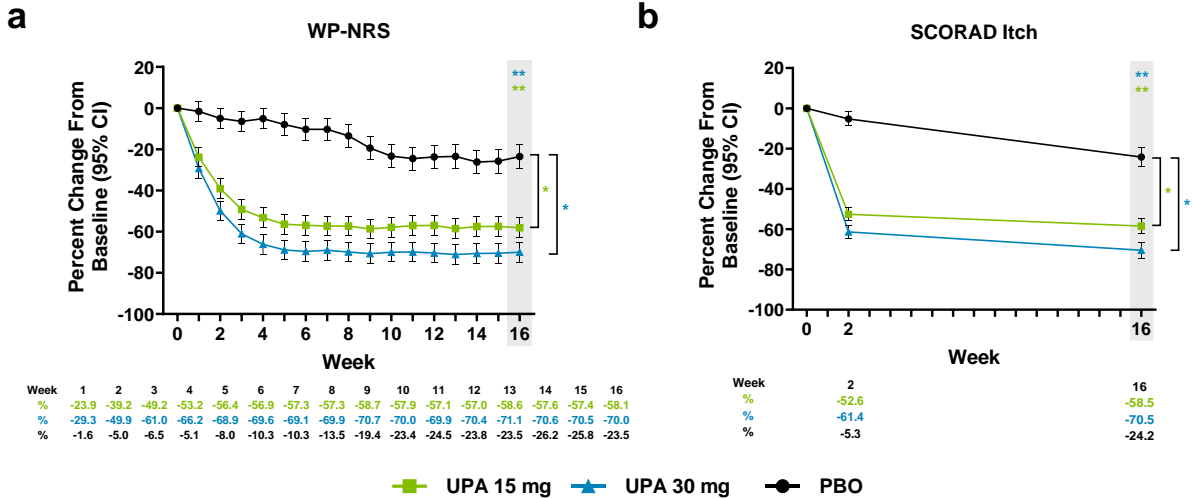

**Supplementary Material Fig. 2** Percent change from baseline in (a) ADerm-SS Skin Pain, (b) ADerm-SS TSS-7, and (c) POEM total score during the double-blind period for patients enrolled in the Measure Up 1 and Measure Up 2 studies (MMRM). Percent change from baseline was estimated via LS mean. \*Nominal  $P < 0.001$  versus placebo for all time points. *ADerm-SS* Atopic Dermatitis Symptom Scale, *CI* confidence interval, *LS* least squares, *MMRM* mixed-effect model repeat measurement, *PBO* placebo, *POEM* Patient-Oriented Eczema Measure, *TSS-77*-item total symptom score, *UPA* upadacitinib

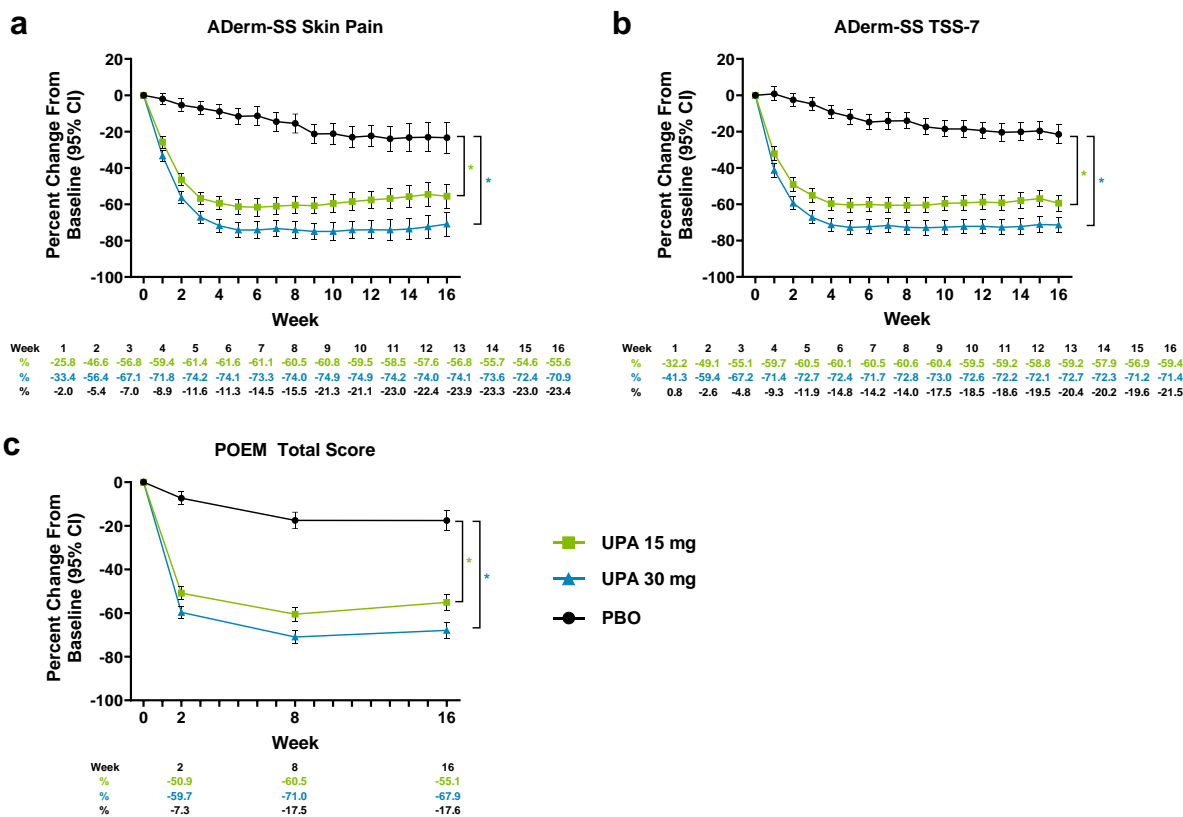

**Supplementary Material Fig. 3** Percent change from baseline in (a) ADerm-IS Sleep (MMRM), (b) SCORAD Sleep (MMRM), and (c) achievement of POEM Sleep 0 (NRI-C) during the double-blind period for patients enrolled in the Measure Up 1 and Measure Up 2 studies. <sup>a</sup>Estimated via LS mean. \*Nominal  $P < 0.001$  versus placebo for all time points. LS least squares, MMRM mixed-effect model repeat measurement, NRI-C non-responder imputation incorporating multiple imputation for missing data due to COVID-19, ADerm-IS Atopic Dermatitis Impact Scale, PBO placebo, POEM Patient-Oriented Eczema Measure, SCORAD SCORing atopic dermatitis, UPA upadacitinib

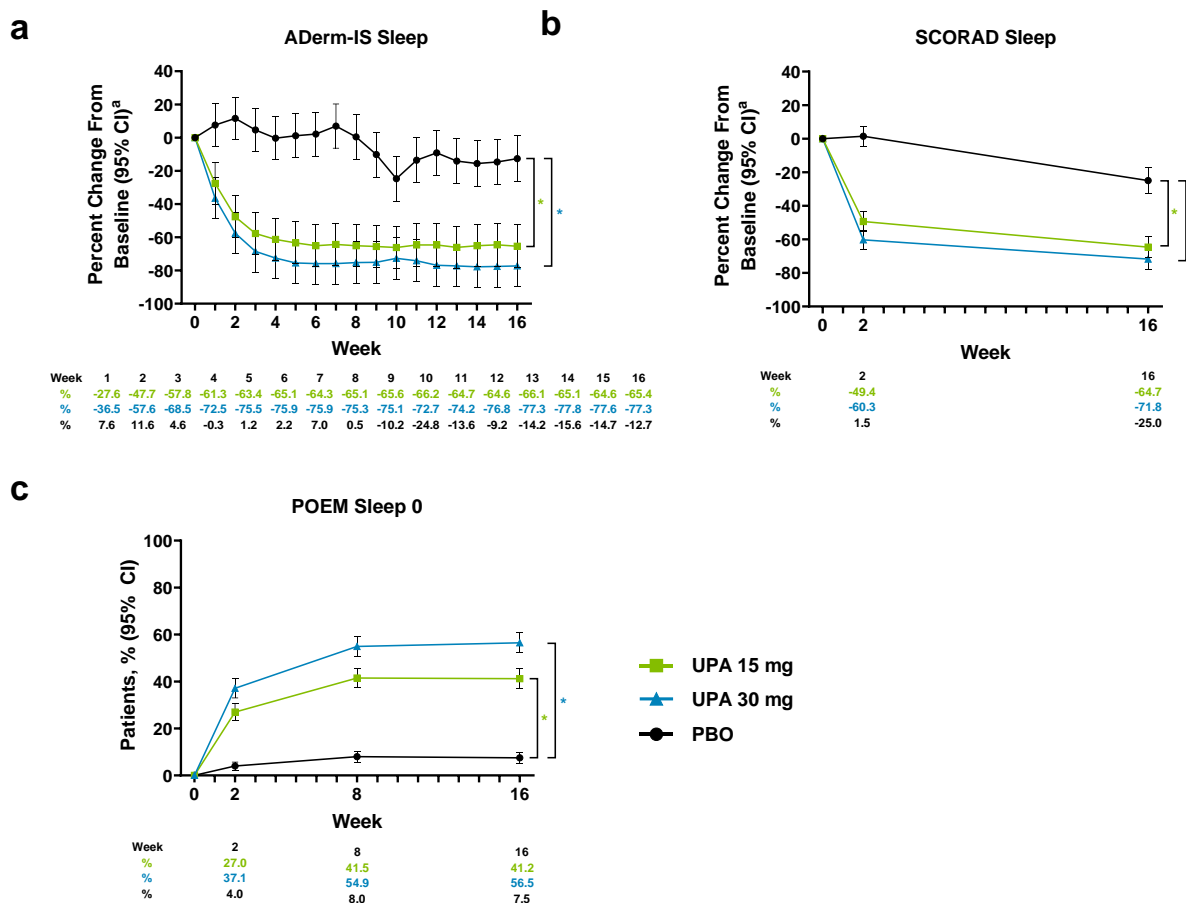

**Supplementary Material Fig. 4** Percent change from baseline in (a) DLQI (MMRM), (b) achievement of CDLQI scores 0/1 (NRI-C), (c) percent change from baseline in CDLQI (MMRM), (d) percent change from baseline in ADerm-IS Daily Activities (MMRM), and (e) percent change from baseline in ADerm-IS Emotional State (MMRM) during the double-blind period for patients enrolled in the Measure Up 1 and Measure Up 2 studies. <sup>a</sup>Estimated via LS mean. \*Nominal  $P < 0.01$  versus placebo for all time points, unless otherwise noted by "NS." ADerm-IS Atopic Dermatitis Impact Scale, CDLQI/Children's Dermatology Life Quality Index, CI confidence interval, DLQI Dermatology Life Quality Index, LS least squares, MMRM mixed-effect model repeat measurement, NRI-C non-responder imputation incorporating multiple imputation for missing data due to COVID-19, NS not significant, PBO placebo, UPA upadacitinib

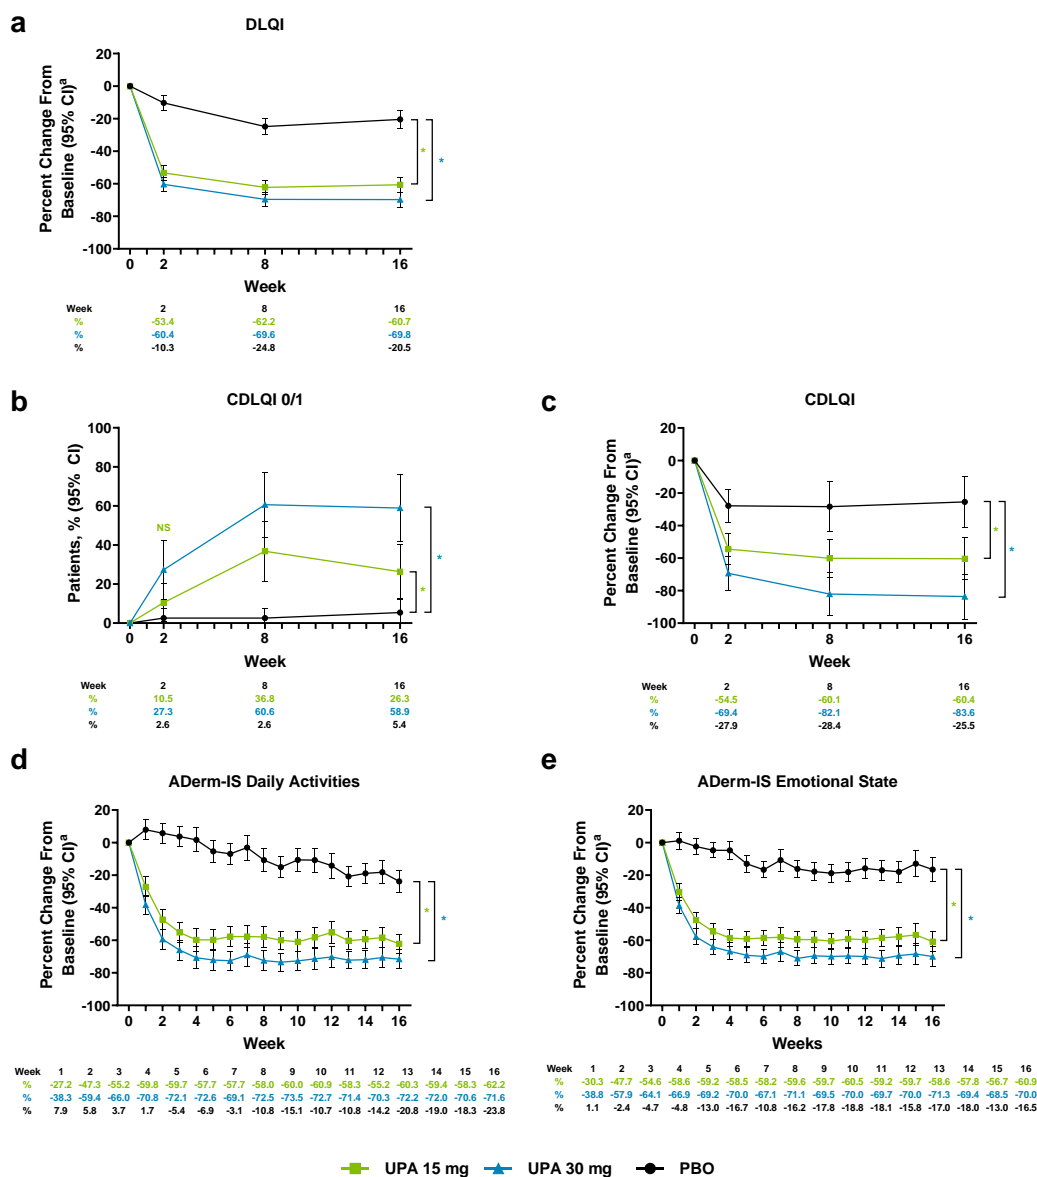

**Supplementary Material Fig. 5** Patients enrolled in the Measure Up 1 and Measure Up 2 studies who achieved HADS-A scores < 8 and HADS-D scores < 8 during the double-blind period (NRI-C).<sup>a</sup> Comparison at time point in shaded box was multiplicity controlled. \*Nominal  $P < 0.001$  versus placebo for all time points. \*\* Multiplicity adjusted  $P < 0.001$  versus placebo.  
<sup>a</sup>Assessed in patients with HADS-A scores  $\geq 8$  or HADS-D scores  $\geq 8$  at baseline. *CI* confidence interval, *HADS-A* Hospital Anxiety and Depression Scale-Anxiety, *HADS-D* Hospital Anxiety and Depression Scale-Depression, *NRI-C* non-responder imputation incorporating multiple imputation for missing data due to COVID-19, *PBO* placebo, *UPA* upadacitinib

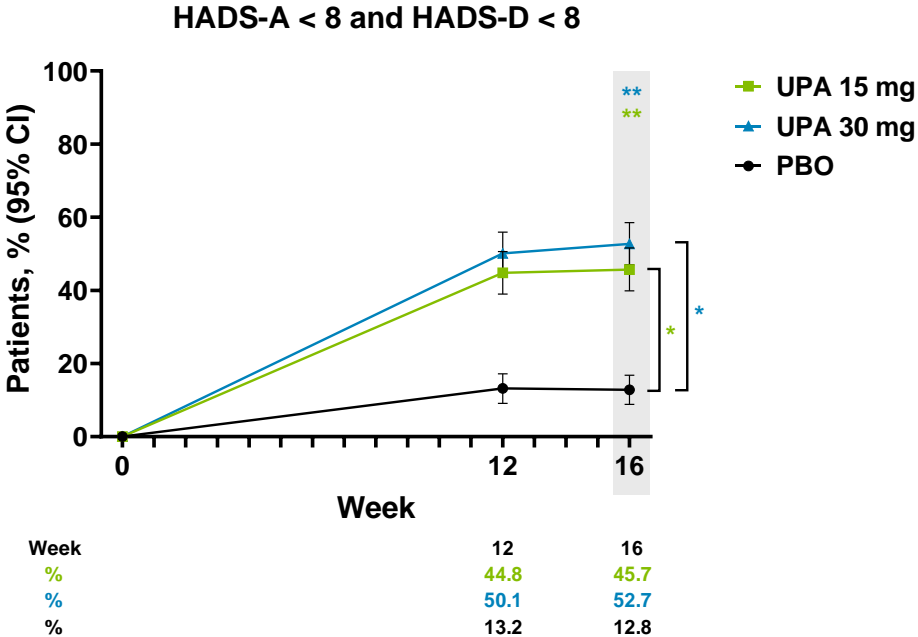

**Supplementary Material Fig. 6** Patient global impressions during the double-blind period for patients enrolled in the Measure Up 1 and Measure Up 2 studies for (a) proportion of patients who report symptoms to be “absent” or “minimal” on the PGIS<sup>a</sup> scale, (b) proportion of patients who are “much improved” or “very much improved” on the PGIC scale, and (c) proportion of patients who are “very satisfied” or “extremely satisfied” on the PGIT<sup>b</sup> scale. <sup>a</sup>Nominal  $P < 0.001$  for all time points. <sup>a</sup>For patients without “absent” or “minimal” symptoms at baseline. <sup>b</sup>For patients who were not “very satisfied” or “extremely satisfied” at baseline. *CI* confidence interval, *PBO* placebo, *PGIC* Patient Global Impression of Change, *PGIS* Patient Global Impression of Severity, *PGIT* Patient Global Impression of Treatment, *UPA* upadacitinib

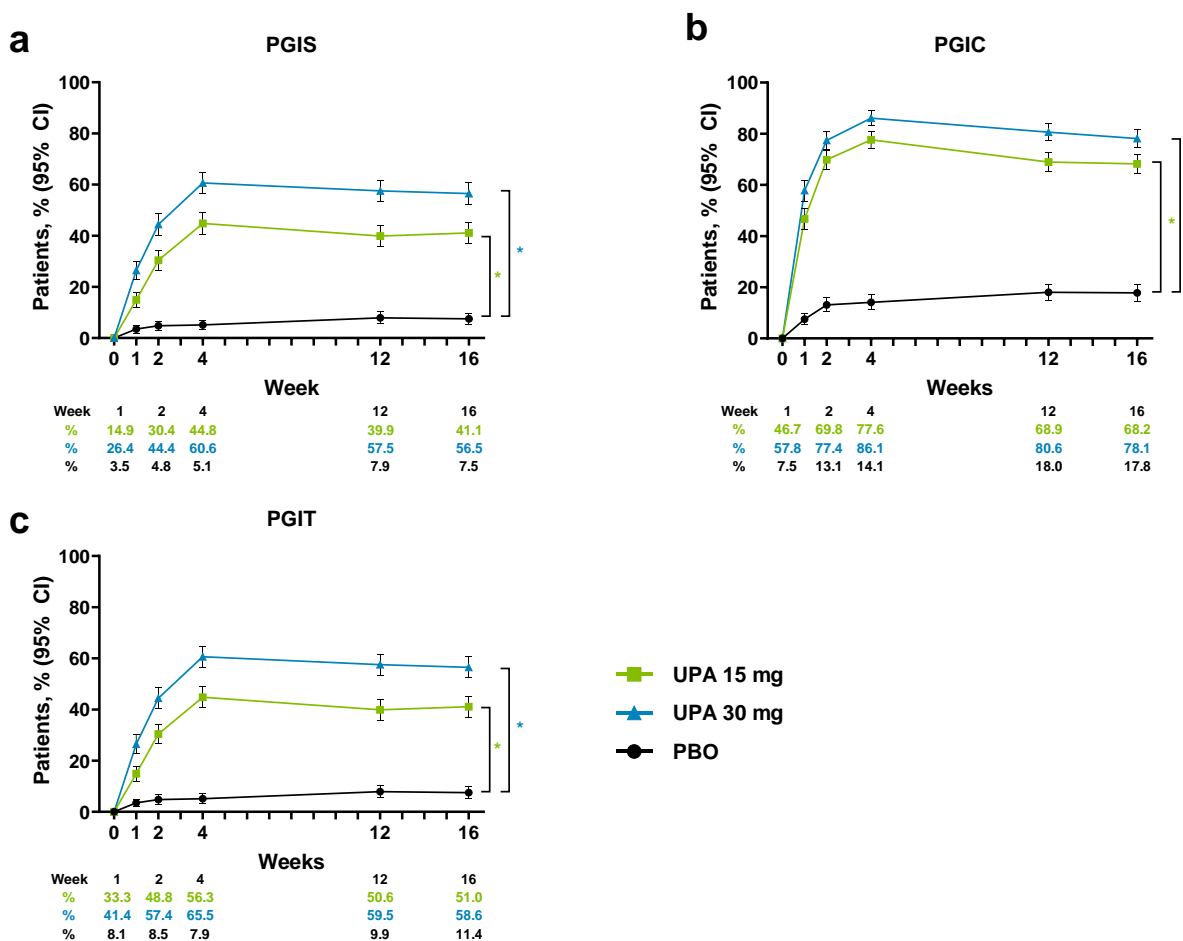

Supplement: 13555_2024_1157_MOESM1_ESM.pdf [file 13555_2024_1157_MOESM1_ESM.pdf]
